# Supplementary material for: A Tool for Multiple Targeted Genome Deletions that Is Precise, Scar-Free, and Suitable for Automation
Source: PLOS journal article supplement (doi:10.1371/journal.pone.0142494), 2015-12-02
Supplement: S5 (10.1371/journal.pone.0142494.s005) [file journal.pone.0142494.s005]

S5 Fig A

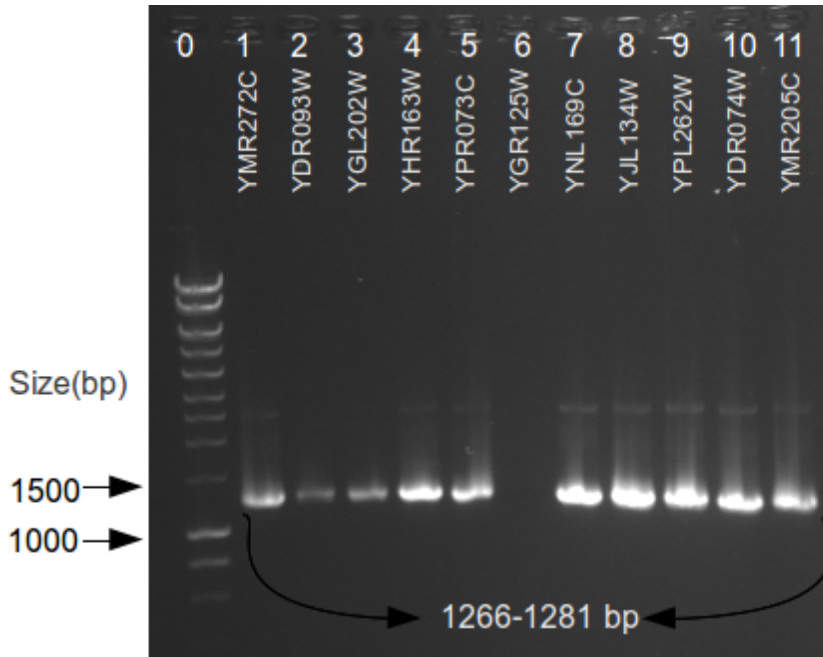

S5 Fig B

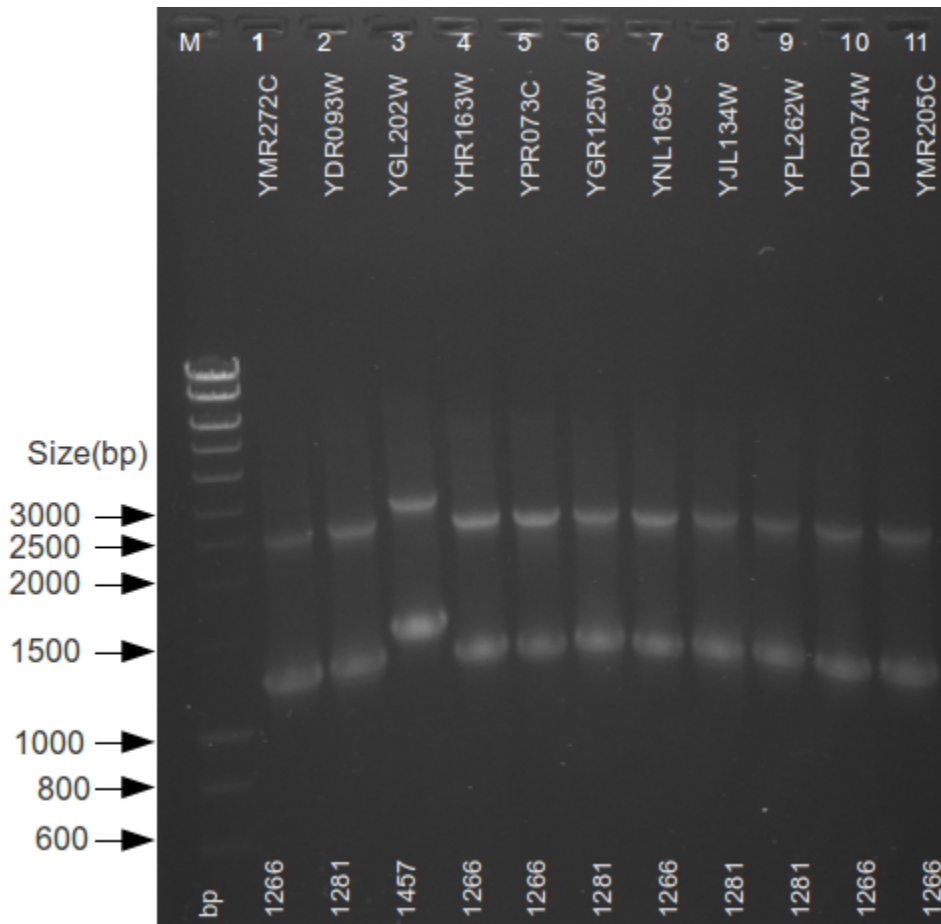

Figure S5 A and B. In addition to products of the expected size (approx 1.25 kb), PCR2 gave an additional product approximately double the expected size (approx 2.5 kb). This additional product was seen on several gels, including the two given here.
